# Supplementary material
Source: PubMed Central journal article supplement (PMC9045748)
Supplement: mmc1.pdf [file mmc1.pdf]

# Supplemental Figure S1

**A.**

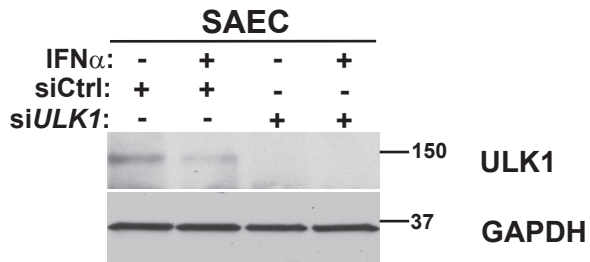

**B.**

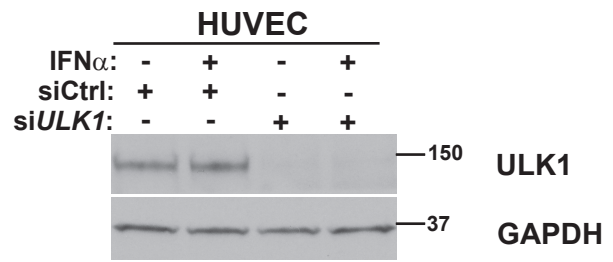

**C.**

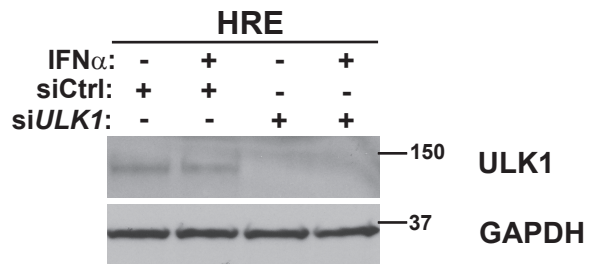

**Supplemental Figure S1. *ULK1* siRNA reduces ULK1 levels in SAEC, HUVEC, HRE cells.** (A) SAEC, (B) HUVEC, (C) HRE cells were transfected with either control siRNA or si*ULK1*. Cells were stimulated with or without 1000 IU/mL IFN $\alpha$  for 24 hours. ULK1 protein levels were determined by western blot analysis.
